# Supplementary material for: Synthesis of a novel micro/mesoporous composite material Beta-FDU-12 and its hydro-upgrading performance for FCC gasoline
Source: Royal Society of Chemistry journal article supplement (doi:10.1039/c5ra19731g), 2015-12-11
Supplement: c5ra19731g1.pdf [file c5ra19731g1.pdf]

## Supporting Information

### Synthesis of novel micro/mesoporous composite material Beta-FDU- 12 and its hydro-upgrading performance for FCC gasoline

Peng Du<sup>1</sup>, Peng Zheng<sup>1</sup>, Shaotong Song<sup>1</sup>, Xilong Wang<sup>1</sup>, Minghui Zhang<sup>1</sup>, Kebin  
Chi<sup>2</sup>, Chunming Xu<sup>1</sup>, Aijun Duan<sup>1,\*</sup>, Zhen Zhao<sup>1,\*</sup>

<sup>a</sup> State Key Laboratory of Heavy Oil Processing, China University of Petroleum,  
Beijing 102249, P.R. China

<sup>b</sup> Petrochemical Research Institute, PetroChina Company Limited, Beijing 100195, P.  
R. China

\* Corresponding authors:

(Aijun Duan) duanaijun@cup.edu.cn; Tel: 86-10-89732290; Fax: 86-10-69724728

(Zhen Zhao) zhenzhao@cup.edu.cn; Tel: 86-10-89731586; Fax: 86-10-69724728

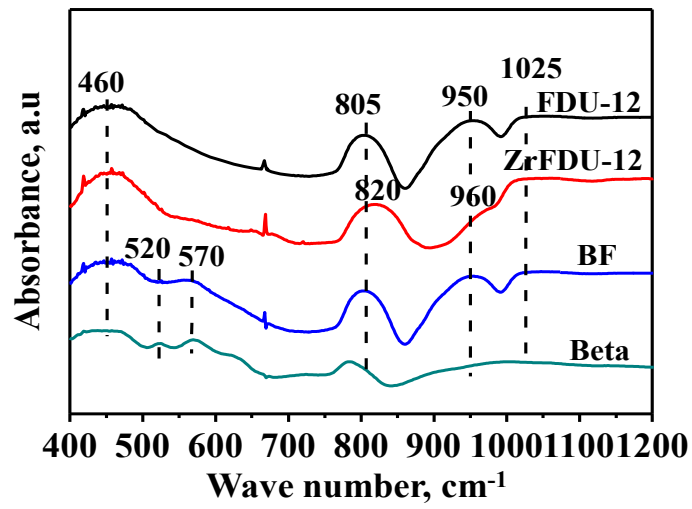

Fig. S1. FTIR patterns of the as-synthesized materials.

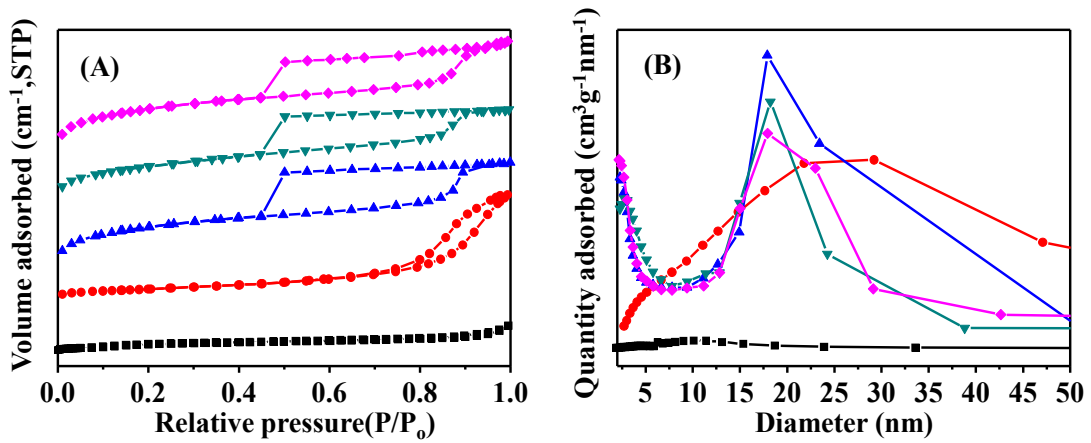

Fig. S2. N<sub>2</sub> adsorption-desorption isotherms (A) and BJH pore diameter distributions (B) of the as-synthesized materials. (■Beta; ● $\gamma$ -Al<sub>2</sub>O<sub>3</sub>; ▲FDU-12; ▼ZrFDU-12; ◆BF)

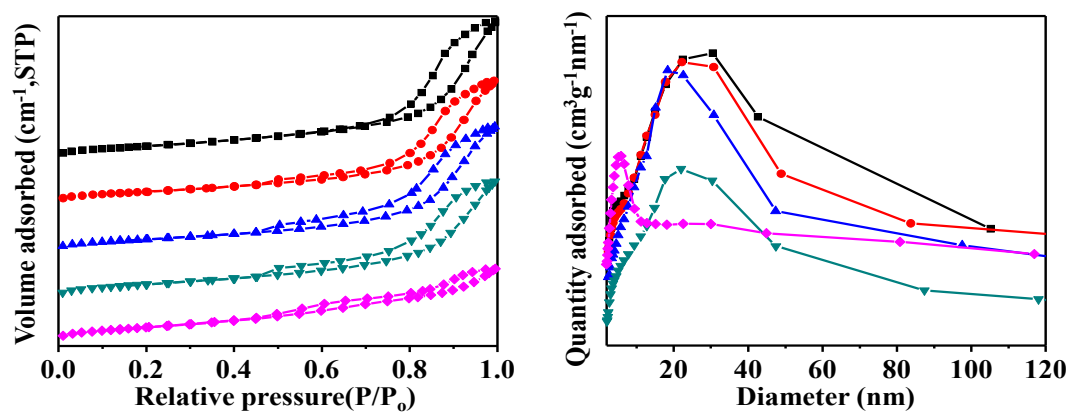

Fig. S3. N<sub>2</sub> adsorption-desorption isotherms (A) and BJH pore diameter distributions patterns (B) of the corresponding catalysts. (■ CoMo/ $\gamma$ -Al<sub>2</sub>O<sub>3</sub>; ● CoMo/FA; ▲ CoMo/ZFA; ▼ CoMo/BFA; ◆ CoMoE/BFA)

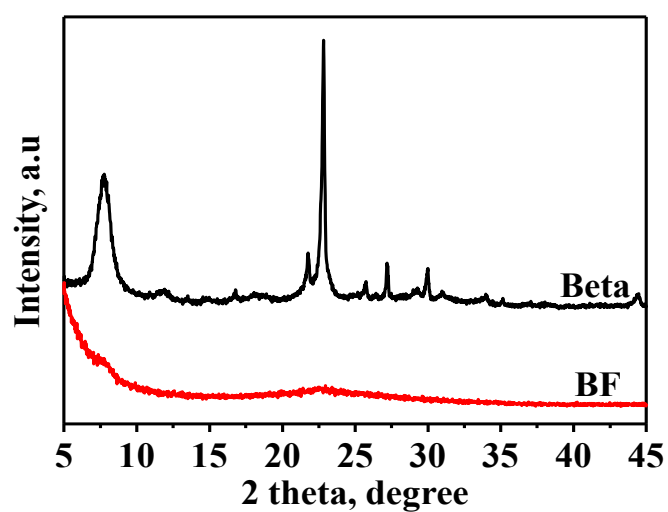

Fig. S4. Wide-angle XRD patterns of the as-synthesized materials.
